# Supplementary material for: Developing Future-Ready University Graduates: Nurturing Wellbeing and Life Skills as Well as Academic Talent
Source: Front Psychol. 2022 Mar 4;13:827517. doi: 10.3389/fpsyg.2022.827517 (PMC8931502; doi:10.3389/fpsyg.2022.827517)
Supplement: Supplementary file 1 [file Table_1.XLSX]

## Sheet: Rawdata T1_T2_T3
	T1							T2																	T3
	SWLS1	SWLS2	SWLS3	SWLS4	SHS1	SHS2	SHS3	SWLS1	SWLS2	SWLS3	SWLS4	SHS1	SHS2	SHS3	L1	L2	L3	L4	L5	L6	L7	L8	L9	L10	SWLS1	SWLS2	SWLS3	SWLS4	SHS1	SHS2	SHS3	L1	L2	L3	L4	L5	L6	L7	L8	L9	L10	L11	L12
participant001	3	4	4	6	4	4	4	3	3	4	6	4	5	4	3	2	3	2	2	2	2	3	3	3	2	5	5	5	4	5	4	4	2	3	3	3	2	3	2	3	3	3	4
participant002	2	4	5	6	5	5	4	4	5	6	6	4	4	3	3	3	2	2	2	2	3	3	2	3	5	6	6	6	5	5	1	2	2	2	2	2	2	3	2	2	2	2	2
participant003	5	5	5	7	5	6	6																		5	6	6	6	6	6	6	3	3	3	3	3	3	3	3	3	3	3	3
participant004	5	7	5	5	6	6	5																		3	6	7	3	6	6	4	3	3	3	3	2	2	2	3	3	3	3	3
participant005	5	5	4	4	6	5	4	6	6	6	6	6	6	6	3	3	3	3	3	3	3	3	3	3	5	5	5	4	6	6	6	4	4	4	4	4	4	4	4	4	4	4	4
participant006	6	5	4	7	7	6	6																		5	4	5	7	5	5	5	3	3	3	3	3	3	3	3	3	3	3	3
participant007	5	5	6	3	5	5	5	4	6	5	4	6	6	6	3	3	3	3	3	3	3	4	3	3	5	7	6	6	7	6	7	4	4	4	4	4	4	4	4	4	4	4	4
participant008	6	7	6	7	5	6	5	7	7	7	7	6	4	5	3	3	3	3	2	3	3	3	3	3	6	7	6	5	5	6	6	3	2	4	4	3	3	3	4	3	3	3	4
participant009	2	3	4	7	4	4	2	3	3	4	5	4	4	5	4	4	4	4	4	4	4	4	4	4	3	2	1	1	5	4	4	4	3	3	4	3	4	3	4	4	3	4	4
participant010	2	4	2	6	5	4	2	4	2	3	3	5	4	3	2	2	2	2	2	2	2	2	2	2	6	5	6	5	4	3	6	3	3	3	3	3	3	3	3	3	3	3	3
participant011	7	7	7	7	6	6	6	7	7	7	7	7	7	7	3	3	4	4	4	3	3	3	3	3	6	6	6	6	6	5	6	3	3	3	3	4	3	4	3	4	4	4	4
participant012	5	6	6	6	6	6	5	5	6	5	5	6	6	6	3	3	3	3	3	3	3	3	3	3	4	6	5	4	7	6	6	2	3	3	3	3	3	3	3	3	3	3	3
participant013	5	6	6	5	5	5	5	5	5	5	6	5	5	5	4	4	3	3	3	3	3	3	3	4	5	5	6	5	5	6	6	3	3	3	4	3	3	3	3	3	3	3	3
participant014	5	6	6	6	7	6	5	5	4	6	5	6	6	5	3	4	3	3	3	3	3	3	3	3	5	6	6	5	6	6	6	4	3	3	3	4	3	3	4	3	3	3	3
participant015	3	4	6	6	5	5	4	4	5	5	5	5	4	3	3	3	4	4	4	4	4	4	4	4	5	6	7	6	5	5	6	3	3	3	3	4	4	4	3	3	3	3	3
participant016	6	5	6	7	6	7	6	5	6	6	4	5	5	5	3	3	2	2	3	3	2	3	3	3	2	6	4	3	5	4	3	3	2	3	3	2	2	3	3	2	3	2	3
participant017	6	7	6	7	6	6	7																		6	5	6	7	7	5	6	3	3	4	4	2	2	2	4	2	4	4	4
participant018	6	4	5	6	5	4	3	5	5	5	5	5	5	4	3	3	4	3	2	3	3	3	3	3	6	6	6	6	6	5	5	4	4	4	3	3	4	3	4	4	4	3	4
participant019	4	6	6	7	5	6	5	3	6	5	3	5	6	6	4	4	4	4	4	3	3	3	3	3	4	6	6	4	6	4	6	3	3	4	3	3	4	2	3	3	3	3	4
participant020	5	4	4	6	5	5	5	3	4	4	4	4	4	4	3	2	2	2	2	3	2	3	2	3	4	3	4	4	5	5	5	3	3	3	3	3	3	2	3	2	3	3	3
participant021	6	6	6	6	7	6	6																		6	5	6	7	7	6	6	3	3	3	3	3	3	3	3	3	3	3	3
participant022	2	6	5	5	4	4	3	5	6	3	4	5	4	4	3	3	3	3	3	3	3	3	3	3	5	6	5	5	5	5	5	3	3	3	3	3	3	2	3	3	3	3	3
participant023	6	6	6	4	5	5	7	4	6	6	4	6	5	7	3	3	3	3	3	3	3	3	3	3	6	7	7	5	6	4	7	4	4	4	4	4	4	4	4	4	4	4	4
participant024	2	4	2	2	2	3	3																		3	3	3	3	3	4	4	3	3	3	3	3	3	3	3	3	3	3	3
participant025	4	4	5	4	5	5	5	4	4	5	4	5	5	4	3	2	2	2	3	2	2	4	2	3	4	5	5	6	5	5	4	3	2	3	3	3	2	3	3	3	3	3	3
participant026	4	6	6	3	4	4	4																		5	6	6	5	6	6	6	3	3	3	3	3	3	3	3	3	3	3	3
participant027	4	6	7	5	5	5	5	6	6	6	4	6	6	5	3	3	3	3	4	4	4	3	4	4	4	7	7	5	6	6	6	4	3	3	3	4	4	4	4	3	3	3	3
participant028	4	6	7	6	6	6	5																		5	7	6	5	6	6	4	4	4	4	4	3	4	4	3	3	3	3	4
participant029	6	6	6	3	6	6	5																		5	6	4	4	5	3	2	3	3	3	2	2	3	3	3	2	3	3	3
participant030	6	5	5	3	4	5	6	5	4	5	3	4	3	4	4	4	3	3	2	3	3	3	3	3	2	3	3	2	3	2	3	3	3	3	3	3	3	3	3	3	3	3	3
participant031	4	6	6	4	6	5	6	3	5	1	1	5	5	4	2	2	2	3	3	3	3	3	3	3	2	6	1	4	5	4	4	3	3	3	3	3	3	3	3	3	3	3	3
participant032	3	3	4	4	4	3	3																		4	4	4	4	4	4	3	3	3	3	3	2	3	3	2	3	3	3	4
participant033	3	5	6	6	5	4	4	3	2	5	5	3	6	4	3	3	3	3	3	3	3	3	3	3	4	5	6	6	4	4	4	3	3	3	3	3	3	3	3	3	3	3	3
participant034	5	6	6	7	6	6	6																		4	5	6	7	6	6	7	2	2	2	2	2	2	2	2	2	2	3	3
participant035	6	6	6	6	6	6	6																		4	5	6	4	7	6	6	4	4	4	4	4	4	4	4	4	4	4	4
participant036	5	6	6	6	5	5	4	5	6	6	6	6	6	6	3	3	3	3	3	3	3	3	3	3	4	6	5	6	5	5	4	3	3	3	3	3	3	3	3	3	3	3	3
participant037	2	6	5	5	5	5	4	4	5	5	4	5	5	5	3	3	3	3	3	3	3	3	3	3	5	6	6	4	5	5	5	3	3	3	3	3	3	3	3	3	3	3	3
participant038	6	4	5	6	5	5	4																		3	4	4	5	5	5	3	3	3	3	3	3	3	3	3	3	3	3	3
participant039	4	6	6	5	5	5	6																		5	4	4	4	4	4	5	3	3	3	3	3	3	3	3	3	3	3	3
participant040	6	5	6	7	5	5	5	4	6	5	4	5	4	5	3	3	3	3	3	3	3	3	3	3	4	6	6	6	5	4	5	3	2	3	3	3	3	3	3	3	3	3	3
participant041	2	6	2	2	2	3	1																		3	6	3	5	4	3	3	3	3	3	3	3	3	3	3	3	3	3	3
participant042	4	6	6	5	2	3	3	3	6	6	5	3	2	4	2	2	3	2	2	2	2	3	2	2	3	6	5	4	4	3	4	3	4	2	2	3	2	2	3	2	3	3	3
participant043	4	5	5	4	5	6	3	4	5	4	4	5	5	6	3	2	2	3	2	3	2	3	2	3	6	6	5	5	5	6	4	2	3	3	2	2	3	2	2	2	2	3	1
participant044	1	2	1	1	2	1	2	4	4	4	4	4	4	4	3	3	3	3	3	2	1	1	3	3	4	4	4	4	4	4	4	3	3	3	2	2	3	3	2	3	2	3	3
participant045	2	4	3	5	4	6	3	4	5	5	5	5	5	5	3	3	3	3	3	3	3	3	3	3	3	4	5	5	4	5	5	3	3	3	3	3	3	3	3	3	3	3	3
participant046	5	5	5	5	6	7	6	4	3	4	5	6	6	4	3	2	3	3	2	2	2	2	2	3	5	6	6	6	6	5	5	3	3	3	3	3	3	3	2	2	3	3	3
participant047	3	5	5	3	4	3	4	3	4	5	5	4	4	4	2	2	2	2	2	2	2	2	2	2	6	6	6	6	6	5	5	3	3	3	3	3	3	3	3	3	3	3	3
participant048	4	4	5	5	4	3	4	5	6	6	4	5	4	5	3	3	3	3	3	3	3	3	3	3	5	6	6	6	5	5	4	3	3	3	3	3	3	3	3	3	3	3	3
participant049	5	6	6	5	5	6	5	4	6	6	5	6	6	5	4	2	3	3	3	2	3	4	2	3	5	7	7	5	6	6	5	4	3	3	3	3	2	3	4	2	3	3	3
participant050	5	6	6	6	5	7	4	5	5	5	5	4	4	4	3	3	3	3	3	3	2	2	3	2	4	4	4	4	4	4	4	3	3	3	3	3	3	3	3	3	3	3	3
participant051	5	6	7	7	5	6	6	6	6	6	6	5	6	5	3	2	3	3	3	2	2	4	3	3	3	6	7	5	5	6	3	3	3	3	3	3	3	3	4	3	4	3	3
participant052	6	6	6	6	5	4	3																		6	6	6	6	5	3	5	4	4	4	4	4	4	4	4	4	4	4	4
participant053	5	5	5	5	5	6	6	6	6	6	6	6	6	6	3	3	3	3	3	3	3	3	3	3	6	6	6	5	6	6	7	3	3	3	3	3	3	3	3	3	3	3	3
participant054	4	4	2	6	1	1	3	6	6	6	6	2	2	5	3	3	3	3	3	3	3	3	3	3	5	5	2	2	1	1	1	3	3	3	3	3	3	3	3	3	3	3	3
participant055	3	6	4	3	6	6	5	4	5	6	4	6	5	5	2	2	3	2	2	3	3	3	3	3	4	5	4	4	5	5	5	3	3	2	2	2	3	3	2	2	2	2	2
participant056	4	5	6	6	5	6	5	4	6	6	6	5	6	5	3	2	2	2	2	2	2	3	2	2	4	5	6	4	6	5	6	3	2	2	2	2	3	2	3	3	2	2	3
participant057	5	3	2	2	5	6	6	4	4	4	3	6	6	5	1	1	2	2	2	2	2	2	2	2	2	2	2	3	5	5	5	3	3	3	3	3	2	2	2	2	3	3	3
participant058	4	4	4	4	4	4	4																		3	4	5	4	5	4	4	3	3	3	3	3	3	3	3	3	3	3	3
participant059	4	6	6	6	5	5	4	4	5	6	4	5	5	4	2	2	2	3	2	3	2	3	2	3	5	4	4	3	5	6	5	3	3	3	3	2	3	3	3	2	3	3	3
participant060	4	6	7	7	5	4	4	4	4	4	4	5	4	4	3	3	3	3	3	3	3	3	3	3	4	3	5	4	5	4	5	3	3	3	3	3	3	3	3	3	3	3	3
participant061	4	4	6	2	5	5	4	4	4	6	4	5	5	4	3	3	3	3	3	3	3	3	3	3	4	4	6	4	5	5	3	3	3	3	3	3	3	3	3	3	3	3	3
participant062	5	7	6	6	6	4	5	4	4	4	4	6	6	5	3	3	3	3	3	3	3	3	3	3	5	6	4	2	5	4	4	4	3	3	3	3	3	3	3	3	3	3	3
participant063	2	3	4	1	4	4	3																		4	4	4	4	3	4	4	3	4	3	3	3	3	3	3	3	3	3	3
participant064	4	4	6	4	5	5	5																		4	4	5	5	5	5	5	3	3	3	3	3	3	3	3	3	3	3	3
participant065	5	5	7	5	5	4	6	6	6	7	5	5	4	6	3	2	3	3	3	3	3	3	3	3	5	6	7	5	7	5	5	3	3	3	3	3	3	3	3	3	3	3	3
participant066	4	2	4	3	5	6	5	5	3	5	5	5	6	3	2	3	4	2	2	3	3	4	2	3	2	5	5	4	5	4	4	2	3	4	4	2	4	3	4	3	3	3	4
participant067	5	6	6	6	6	6	6	3	4	6	5	5	4	4	3	4	4	4	4	4	4	3	2	2	3	4	4	3	6	6	5	1	1	2	3	2	2	1	3	3	2	2	3
participant068	7	7	6	6	6	6	6	7	6	6	6	7	7	5	3	3	4	3	2	3	2	3	3	3	7	7	6	7	6	6	5	3	2	3	3	3	3	3	3	3	3	3	3
participant069	4	5	5	6	6	6	6	3	6	4	4	5	5	4	2	3	3	3	2	3	3	3	3	3	3	5	5	3	5	3	5	2	2	3	3	2	3	2	3	3	3	3	3
participant070	5	5	5	5	5	6	5	5	6	6	5	3	3	4	3	3	3	3	2	3	3	2	2	3	2	3	3	3	4	4	4	2	2	2	2	2	3	2	2	2	2	2	2
participant071	4	4	6	6	6	6	6																		5	5	5	6	6	6	6	3	3	3	3	3	2	2	3	3	3	3	3
participant072	5	6	6	5	6	7	5	5	5	6	4	6	7	4	2	3	4	3	3	3	3	3	1	3	5	6	6	4	5	6	5	3	3	2	3	2	3	3	2	2	3	3	3
participant073	5	5	6	5	5	6	6	6	5	6	6	6	6	5	3	2	2	2	3	3	2	3	2	2	3	3	3	3	5	6	4	3	2	3	3	2	3	2	3	2	2	2	2
participant074	5	5	5	5	5	5	5	6	6	5	5	5	5	5	3	3	3	3	3	3	3	3	3	3	5	5	5	5	5	5	4	3	3	3	3	3	3	3	3	2	3	3	3
participant075	5	5	6	4	5	6	5																		5	6	6	6	5	5	5	2	2	3	3	3	3	2	3	2	2	3	3
participant076	4	3	6	6	7	7	6	4	4	5	4	4	4	4	4	2	1	3	1	2	3	4	1	2	4	5	5	6	7	7	7	3	3	3	3	3	3	3	3	3	3	3	3
participant077	5	6	6	4	5	6	5																		5	6	5	3	5	6	5	2	2	3	2	3	3	2	3	2	2	2	3
participant078	3	6	5	7	4	3	4	3	4	6	6	5	4	4	3	3	3	3	3	3	3	3	3	3	5	6	6	5	4	5	4	3	3	4	3	3	3	3	4	4	3	3	3
participant079	4	3	4	2	4	4	4																		4	5	4	1	6	5	5	3	3	2	2	3	3	3	3	2	3	3	3
participant080	4	4	4	4	4	4	5																		6	5	6	4	4	3	5	2	2	2	2	2	2	2	3	2	2	2	2
participant081	3	3	5	3	4	3	6	5	4	4	3	4	3	6	2	3	3	3	3	3	3	3	3	3	5	5	6	4	5	5	5	3	3	3	3	3	3	3	3	3	3	3	3
participant082	2	3	4	7	5	5	6	6	6	6	5	5	6	6	3	2	3	3	3	3	2	3	2	2	4	3	4	2	6	6	6	3	2	3	3	3	3	2	3	2	3	3	3
participant083	3	4	4	4	4	6	4	4	6	3	5	4	5	5	3	3	3	3	3	3	3	3	3	3	3	4	6	4	7	7	7	3	3	3	3	3	3	3	3	3	3	3	3
participant084	2	3	4	4	4	4	4																		4	5	5	5	4	3	4	2	3	2	2	3	3	3	3	3	3	3	3
participant085	5	5	5	1	5	6	4	2	1	1	1	2	3	3	4	4	4	4	4	4	3	3	3	3	4	2	3	1	4	5	4	3	3	3	3	3	3	3	3	3	3	3	3
participant086	5	4	5	4	5	5	5	5	4	4	4	5	5	4	3	3	3	3	3	3	3	3	3	3	4	4	3	3	4	4	4	3	3	3	3	3	3	3	3	3	3	3	3
participant087	5	4	4	3	4	3	4	4	4	4	3	7	5	5	3	4	2	3	4	4	3	3	2	3	5	4	5	4	5	5	5	3	3	3	3	3	3	3	3	3	4	3	3
participant088	5	5	6	7	6	4	5	4	6	5	3	5	5	4	3	3	3	3	3	3	2	2	2	3	3	3	4	4	5	4	4	2	3	3	3	3	3	2	3	3	3	3	3
participant089	3	5	3	7	3	4	4																		5	3	2	4	4	4	3	2	2	3	3	2	2	2	3	3	3	2	2
participant090	1	1	1	1	3	2	1	1	5	2	1	4	2	1	3	3	3	3	3	3	3	3	3	3	2	3	1	1	3	5	4	2	3	3	3	3	3	3	3	3	3	3	3
participant091	4	5	5	3	5	4	5																		5	5	5	4	6	6	5	3	3	3	3	3	3	3	3	3	3	3	3
participant092	6	7	7	4	5	5	6																		5	5	6	4	6	5	3	1	4	4	3	1	1	1	2	3	3	4	1
participant093	4	4	5	4	5	5	5																		6	6	6	6	7	4	7	2	2	2	2	2	2	2	2	2	2	2	2
participant094	5	5	6	2	5	6	4																		6	6	6	4	3	1	3	3	3	3	2	2	2	2	2	2	2	2	2
participant095	4	4	2	1	3	3	5	6	6	5	3	4	4	3	4	3	4	4	4	4	4	4	4	4	3	4	4	3	5	5	5	3	3	4	3	4	3	4	4	4	3	3	4
participant096	4	4	4	3	4	2	5	3	5	5	5	4	4	4	3	3	3	3	3	3	3	3	3	3	5	4	5	4	4	4	4	3	3	3	3	3	3	3	3	3	3	3	3
participant097	5	5	5	4	5	4	4																		5	5	5	4	5	5	5	3	3	3	3	3	3	3	3	3	3	3	3
participant098	5	6	5	5	4	5	5	4	5	5	5	5	6	4	3	3	3	3	3	3	3	4	4	3	5	5	6	5	5	4	4	3	4	4	4	4	4	4	4	3	3	3	3
participant099	5	7	4	5	3	2	2	5	5	6	3	5	5	2	4	3	3	3	3	3	3	4	4	4	5	5	6	5	6	5	5	4	4	3	3	3	3	3	3	3	3	3	3
participant100	3	3	3	2	4	3	4	3	3	4	3	4	3	3	3	3	3	3	3	3	3	3	3	3	3	5	5	4	4	3	4	3	3	3	3	3	3	3	3	3	3	3	3
participant101	3	4	5	5	4	4	4	4	6	6	6	4	4	4	3	3	3	3	3	3	3	3	3	3	4	6	4	3	4	4	4	3	3	3	3	3	3	3	3	3	3	3	3
participant102	5	5	4	6	5	6	6	1	5	4	3	1	2	3	2	3	4	4	2	4	1	4	4	4	4	4	4	4	6	6	6	2	3	3	3	3	3	3	2	3	3	3	3
participant103	4	5	6	6	5	4	4																		6	6	5	6	4	4	4	3	3	3	3	3	3	3	3	3	3	3	3
participant104	4	4	6	4	7	5	6	6	6	6	6	7	6	7	3	3	3	3	3	3	3	3	3	3	6	6	7	3	7	5	4	3	4	3	3	3	4	4	4	3	4	4	3
participant105	5	5	4	4	4	4	3	4	3	2	1	4	5	4	3	3	3	1	3	3	2	3	3	3	2	5	4	3	4	5	4	3	2	3	3	2	3	3	3	3	3	3	3
participant106	5	5	5	5	2	3	5	2	6	5	2	2	3	3	2	3	3	3	3	1	2	4	3	3	5	6	5	6	4	3	2	2	2	3	3	3	3	3	2	2	2	3	3
participant107	6	5	7	6	4	2	4	5	5	7	7	4	2	2	3	3	3	3	3	3	3	3	3	2	6	6	6	4	4	2	5	3	3	4	4	3	3	3	2	2	3	3	3
participant108	4	7	7	7	5	5	5																		5	7	7	4	5	5	5	3	3	4	3	3	3	3	3	3	3	3	3
participant109	4	4	4	4	5	5	5	4	4	4	4	5	5	5	3	3	3	3	3	3	3	3	3	3	4	4	4	4	4	4	4	3	3	3	3	3	3	3	3	3	3	3	3
participant110	3	3	3	6	5	6	4	3	3	6	5	6	7	6	3	3	3	3	3	3	3	3	3	3	3	3	3	3	6	6	4	3	3	3	3	3	3	3	3	3	3	3	3
participant111	3	5	5	5	3	3	1	4	3	3	4	5	4	4	2	2	2	2	2	2	3	2	2	2	5	5	5	4	3	5	2	3	2	2	2	2	2	2	2	2	2	3	3
participant112	4	4	4	2	4	3	4																		7	7	7	3	5	3	4	3	3	3	2	3	3	2	2	2	3	3	3
participant113	5	5	6	7	6	5	5	3	4	4	3	3	4	3	3	3	3	3	3	3	3	3	3	3	3	3	4	5	5	6	5	3	3	3	3	3	3	3	3	3	3	3	3
participant114	5	6	6	6	6	5	4	5	6	6	4	4	4	5	3	3	3	3	3	3	3	3	2	2	5	6	6	6	5	4	5	3	3	3	3	3	3	3	3	3	3	3	3
participant115	2	6	7	5	4	4	7	6	6	6	6	4	4	4	3	3	3	3	3	3	3	3	3	3	6	6	6	6	5	5	5	3	3	3	3	3	3	3	3	3	3	3	3
participant116	6	6	6	6	5	5	4	5	5	6	5	5	5	5	3	3	3	3	3	3	3	3	3	3	4	5	6	3	5	5	5	3	3	3	3	3	3	3	3	3	3	3	3
participant117	6	6	5	2	6	6	6																		5	5	5	5	5	4	5	3	3	3	3	3	3	3	3	3	3	3	3
participant118	4	5	4	5	4	5	5																		6	6	6	6	5	5	4	3	3	3	3	3	3	4	4	3	4	3	3
participant119	4	4	4	4	5	6	5	4	4	4	4	5	6	5	3	3	3	3	3	3	3	3	3	3	4	4	4	4	5	5	5	3	3	3	3	3	3	3	3	3	3	3	3
participant120	4	3	4	2	5	6	5	4	5	6	4	7	5	6	3	2	3	3	3	3	2	2	3	3	5	6	4	4	6	5	5	3	2	3	3	2	3	3	3	3	3	3	3
participant121	3	5	4	1	5	7	7	5	5	6	2	6	6	5	4	2	1	2	3	2	2	3	4	2	3	4	5	4	2	2	4	4	3	3	3	3	3	3	3	3	3	3	3
participant122	6	4	5	5	5	5	5																		5	6	5	6	4	5	4	3	3	3	3	3	3	3	3	3	3	3	3
participant123	4	4	4	4	5	5	5	3	4	6	6	7	5	5	2	2	2	2	3	2	3	3	2	2	4	5	6	3	5	5	5	3	3	3	3	3	2	2	3	2	2	2	3
participant124	3	6	6	3	5	5	2																		4	4	5	3	5	6	4	2	3	2	2	2	2	3	2	2	2	2	2
participant125	2	4	4	2	5	5	4	4	4	4	4	4	4	4	2	2	2	3	2	2	2	2	2	2	2	5	4	4	5	5	3	2	3	3	3	3	3	3	3	3	3	3	3
participant126	6	3	5	6	4	2	2	5	4	6	5	5	4	5	3	3	3	3	3	3	3	4	4	4	7	5	7	6	6	3	6	4	2	3	3	3	3	4	3	4	3	3	4
participant127	4	5	4	6	2	2	2																		2	2	2	5	3	3	4	3	3	3	3	3	3	3	3	3	3	3	4
participant128	5	6	6	6	5	5	5																		5	6	7	7	6	6	7	4	4	3	3	3	3	3	4	3	3	3	3
participant129	3	5	7	7	5	7	6																		5	6	6	7	5	6	5	2	2	2	2	2	2	2	3	2	2	2	2
participant130	6	5	6	6	6	6	4	6	6	6	6	5	5	3	3	3	3	3	3	3	3	3	3	3	6	6	6	6	5	5	4	3	3	3	3	3	3	3	3	3	3	3	3
participant131	3	6	7	6	6	7	7	2	7	5	6	7	7	4	3	3	3	3	3	3	3	3	3	3	7	4	7	7	7	7	7	4	4	4	4	4	4	4	4	4	4	4	4
participant132	4	4	4	2	3	5	4																		3	4	5	3	5	6	5	2	2	2	3	3	3	2	3	2	3	3	2
participant133	5	4	5	4	5	3	5	2	6	6	6	5	4	4	3	3	3	3	3	3	3	3	3	3	4	5	5	4	5	5	5	3	3	3	3	3	3	3	3	3	3	3	3
participant134	6	5	5	5	4	4	3	4	4	5	4	6	4	3	4	2	3	3	3	2	2	4	3	3	4	5	4	5	5	4	5	3	4	3	3	4	3	4	2	3	4	4	4
participant135	4	6	6	6	5	5	6	5	6	7	6	5	4	5	3	3	3	3	3	3	3	3	3	3	5	6	6	5	6	7	5	3	3	3	3	3	3	3	3	2	3	3	3
participant136	6	6	7	6	5	6	5	4	6	6	6	5	6	6	2	2	3	2	2	3	3	3	3	3	4	5	6	4	4	5	5	3	3	3	3	3	3	3	3	3	3	3	3
participant137	6	6	6	6	5	5	4																		5	6	6	5	6	5	4	3	3	3	3	3	3	3	3	3	3	3	3
participant138	5	4	3	2	6	5	5	5	5	6	6	6	6	5	3	3	3	3	3	4	4	4	4	4	3	5	6	5	6	6	5	3	2	2	2	2	2	2	3	2	3	2	3
participant139	3	6	6	6	5	5	3	4	6	6	6	6	5	5	3	3	3	3	3	3	3	3	3	3	4	5	6	6	5	6	4	3	3	3	3	3	3	3	3	3	3	3	3
participant140	5	4	4	4	4	5	4	5	5	6	5	5	5	5	2	3	3	2	3	3	3	3	3	3	5	5	5	6	5	5	5	3	3	3	3	3	3	3	3	3	3	3	3
participant141	5	5	6	6	6	5	5	5	6	6	6	6	6	5	3	3	3	3	2	3	2	3	3	3	5	6	6	6	6	6	6	3	3	3	3	3	3	3	3	3	3	3	3
participant142	3	4	7	1	7	7	7	3	4	5	6	5	5	5	2	3	2	3	2	3	3	2	3	3	4	5	5	4	5	5	4	4	1	1	2	3	3	2	1	3	4	1	2
participant143	6	6	6	4	5	4	5	5	6	7	6	6	5	4	3	3	3	3	3	3	3	3	3	3	5	5	6	5	5	5	5	3	3	3	3	3	3	3	3	3	3	3	3
participant144	4	5	5	5	5	4	4	3	5	4	3	4	3	4	2	2	2	2	2	2	2	2	2	2	4	5	5	6	4	4	4	2	3	3	3	3	3	3	3	3	3	3	3
participant145	3	6	6	5	6	6	6	2	6	6	6	7	6	6	3	3	3	3	3	3	3	3	3	3	2	5	5	3	6	6	6	3	3	3	3	3	3	3	3	3	3	3	3
participant146	3	3	3	2	5	5	5	5	5	4	4	5	5	5	3	3	2	3	3	2	3	3	1	3	3	4	5	4	5	5	5	2	2	3	3	3	3	3	3	1	3	2	2
participant147	4	4	4	4	4	3	3																		2	5	4	4	4	4	5	2	3	3	2	2	3	3	3	2	3	2	3
participant148	3	2	3	5	2	2	2	3	5	4	6	5	5	5	3	3	3	3	3	3	2	3	3	3	4	6	4	5	3	4	4	2	3	2	3	2	2	4	3	2	3	2	1
participant149	7	6	6	6	5	7	5	6	6	6	6	7	7	7	3	2	2	2	3	3	3	3	3	3	6	6	6	7	6	6	4	2	2	2	3	3	3	3	3	3	3	3	3
participant150	5	6	6	6	5	5	4	5	6	6	6	6	6	5	4	3	3	3	3	3	4	3	4	4	5	6	6	5	6	7	5	3	3	3	3	3	3	3	3	3	3	3	3
participant151	3	4	5	3	4	4	4																		3	4	5	5	4	4	3	3	3	3	3	3	3	3	3	3	3	3	3
participant152	6	4	4	4	5	5	4																		4	4	4	4	4	4	4	3	3	3	3	3	3	3	3	3	3	3	3
participant153	7	7	7	7	7	7	6																		7	7	7	7	5	6	6	3	3	3	3	4	3	3	3	3	3	3	3
participant154	4	2	1	1	7	7	7	3	3	4	4	4	4	4	3	3	3	3	3	3	2	3	3	3	5	3	1	1	3	3	3	2	3	2	2	2	2	2	2	3	2	2	2
participant155	4	4	7	7	7	7	6																		2	1	3	2	4	4	4	3	3	3	3	3	3	3	3	3	3	3	3
participant156	5	4	5	7	5	5	5																		2	4	6	6	5	5	5	3	3	3	2	3	3	3	3	3	3	3	3
participant157	1	1	1	2	3	3	2	2	2	3	2	3	2	3	2	2	2	2	2	2	2	2	2	2	2	3	2	2	3	3	3	3	3	3	3	2	3	3	3	2	3	3	3
participant158	1	3	6	3	5	4	5	6	7	5	3	4	6	4	2	3	3	3	3	2	2	4	2	3	6	6	6	6	5	5	6	3	3	3	3	3	3	3	3	3	3	3	3
participant159	4	5	2	4	4	4	3																		3	5	2	4	4	3	4	2	2	2	2	2	2	3	2	2	2	2	2
participant160	4	4	4	5	5	5	5	5	5	4	4	5	4	4	3	3	3	3	3	3	3	3	3	3	2	6	4	3	5	4	3	3	3	3	3	3	3	3	3	3	3	3	3
participant161	6	6	6	6	4	5	5																		5	6	6	4	5	4	4	3	3	3	3	4	3	2	3	2	3	3	3
participant162	4	3	4	4	3	4	4	3	4	4	5	3	4	4	3	3	3	2	2	2	2	3	2	3	3	3	4	3	4	4	5	3	3	3	3	3	3	3	3	3	3	3	3
participant163	2	2	2	5	4	3	4																		3	2	1	2	4	3	6	3	3	3	3	3	3	3	3	3	3	3	3
participant164	6	7	7	7	7	6	7	4	4	6	7	7	6	6	4	3	3	3	3	3	3	2	3	2	6	7	6	7	6	6	6	4	3	4	4	4	4	4	4	4	4	4	4
participant165	3	6	3	5	4	3	4	2	6	4	5	4	3	3	2	2	3	2	2	2	2	2	2	2	4	6	4	5	5	5	4	3	2	2	2	2	3	2	3	1	3	2	2
participant166	5	4	4	2	5	5	5	4	4	4	4	7	7	5	2	2	3	3	3	2	3	3	3	3	3	3	4	4	7	6	5	3	3	3	3	3	3	3	3	3	3	3	3
participant167	4	4	4	4	5	5	4	4	5	3	3	4	4	3	3	2	3	3	3	3	3	3	3	3	4	4	5	3	5	5	5	2	3	3	3	3	3	3	3	3	3	3	3
participant168	5	6	5	5	6	5	6	6	6	6	5	7	6	5	3	3	3	3	3	3	3	3	3	3	2	3	3	5	5	6	4	3	3	3	3	3	3	3	3	3	3	3	2
participant169	5	6	5	5	6	7	6	5	4	4	3	5	3	5	3	3	3	3	3	3	2	2	3	3	6	5	6	6	5	5	5	3	3	3	3	3	2	2	3	4	3	3	3
participant170	5	6	6	4	4	4	2	6	6	6	6	4	4	5	3	3	3	3	2	2	2	3	3	3	5	6	6	4	4	4	4	2	3	2	2	2	3	2	2	3	3	2	3
participant171	5	7	7	7	6	6	5	5	6	5	5	6	5	5	3	3	3	3	3	3	3	3	3	3	4	6	5	4	5	5	4	3	3	4	4	4	4	4	4	4	4	3	3
participant172	3	4	2	1	3	3	3	1	1	2	1	1	1	2	2	2	2	2	2	3	2	2	2	3	1	3	1	1	3	2	2	1	2	1	2	2	3	2	3	1	4	2	2
participant173	4	7	6	6	5	7	6																		4	6	6	6	5	6	4	3	3	2	2	3	3	3	3	3	3	2	3
participant174	5	4	6	6	5	5	5	4	5	6	6	5	6	6	2	2	3	3	2	3	2	3	2	3	4	4	5	6	5	5	5	2	2	3	3	3	3	2	3	3	3	3	2
participant175	5	7	7	5	5	5	5																		6	6	7	7	7	7	7	3	3	3	3	3	3	3	3	3	3	3	3
participant176	4	4	4	4	4	4	4	4	4	4	4	5	5	3	2	3	2	2	2	2	2	2	2	2	4	4	4	4	5	5	5	3	3	3	3	3	3	3	3	3	3	3	3
participant177	6	6	6	5	6	6	5	5	6	6	5	5	6	5	3	3	3	3	3	3	3	3	3	3	5	6	5	5	6	5	6	3	3	3	3	3	3	3	3	3	3	3	3
participant178	7	7	6	5	6	7	7	7	7	7	7	6	4	7	3	3	3	2	2	3	2	3	2	3	7	7	6	6	7	7	7	4	3	3	3	3	4	2	4	2	3	3	3
participant179	6	7	6	6	5	5	6																		5	5	6	4	5	4	6	3	3	3	3	3	3	3	2	3	3	3	3
participant180	4	3	5	6	5	4	5																		6	6	6	6	6	6	6	3	3	3	3	3	3	3	3	3	3	3	3
participant181	3	5	4	6	5	4	5	4	5	4	4	5	4	3	2	3	3	3	3	3	3	3	2	3	3	4	4	4	3	3	4	2	3	3	3	3	3	2	2	2	3	3	2
participant182	5	5	5	5	5	5	5																		3	4	4	3	4	5	5	3	2	3	3	2	2	3	3	3	3	3	3
participant183	4	4	4	5	4	4	4	4	4	4	4	4	4	4	2	2	2	2	2	2	2	2	2	2	4	4	4	4	4	4	4	2	2	2	2	2	2	2	2	2	2	2	2
participant184	3	5	5	5	5	4	4	3	2	2	2	3	2	3	2	3	2	2	3	2	3	3	3	3	3	2	3	3	5	5	5	3	3	3	3	3	2	3	3	3	3	3	3
participant185	6	6	7	7	7	6	6	6	6	6	7	7	7	5	2	2	2	2	4	3	2	3	1	3	6	7	7	7	7	7	7	3	3	3	3	3	3	3	3	3	3	3	3
participant186	5	5	5	4	5	4	4	6	6	6	6	5	4	4	3	3	3	3	3	3	3	3	3	3	4	4	4	4	4	4	4	3	3	2	2	3	3	3	3	3	3	3	3
participant187	4	5	5	5	6	6	7	5	5	5	5	5	5	7	2	3	3	3	3	3	3	3	3	3	4	4	4	4	5	6	6	3	3	3	3	3	4	4	4	4	3	4	4
participant188	3	3	3	3	4	4	4	2	2	2	2	3	3	3	3	3	3	3	3	2	3	4	2	3	4	4	4	4	4	4	4	3	3	2	2	2	3	2	2	3	3	2	2
participant189	3	6	6	4	6	5	5																		4	5	5	3	5	4	4	3	3	3	3	4	3	3	3	3	3	3	3
participant190	7	7	7	7	7	7	7	5	5	6	6	5	5	5	3	3	3	3	3	3	3	3	3	3	6	6	4	5	6	5	5	4	4	4	4	4	4	4	4	4	4	4	4
participant191	5	6	6	6	5	4	3																		4	5	6	6	5	5	4	2	2	3	2	3	3	3	3	3	3	2	3
participant192	4	5	6	5	5	4	3	5	5	6	6	5	5	4	2	3	3	3	3	3	2	2	2	2	4	5	5	4	5	5	5	2	3	3	3	2	2	2	2	3	2	3	3
participant193	5	5	2	5	5	6	4	5	6	3	2	5	4	2	3	3	3	3	3	3	3	3	3	3	3	3	3	2	5	3	4	3	3	3	3	3	3	3	3	3	3	3	3
participant194	6	6	6	6	6	6	6																		6	6	6	6	6	6	6	3	3	3	3	4	3	3	3	3	3	3	3
participant195	5	5	4	6	6	5	4	3	5	5	3	5	5	5	2	3	3	3	3	3	2	2	2	3	3	3	5	2	5	5	5	3	3	3	3	3	2	2	2	2	3	3	3
participant196	4	5	6	5	5	5	5	3	3	5	4	5	5	5	3	3	3	3	2	3	3	3	2	3	4	6	6	5	5	4	5	3	3	3	3	2	3	3	3	2	3	3	2
participant197	6	6	6	5	5	4	4	3	7	6	6	5	4	4	2	2	3	3	3	3	3	3	2	3	6	6	6	5	5	4	4	3	3	2	2	2	3	3	3	2	3	3	3
participant198	5	6	6	5	5	5	5	5	6	6	4	5	4	5	3	3	4	4	1	2	1	4	1	3	6	6	6	6	5	4	5	4	4	4	4	4	4	4	4	3	4	3	4
participant199	5	5	5	5	6	7	5																		3	5	4	3	4	6	5	1	1	3	2	2	2	2	2	3	3	3	3
participant200	5	5	5	4	5	5	5	4	5	6	6	5	6	4	3	3	3	3	3	3	3	3	3	3	4	5	6	4	5	5	5	3	3	3	3	3	3	3	3	3	3	3	4
participant201	5	7	7	4	6	5	4	5	7	6	3	6	5	5	3	3	3	3	3	3	3	3	3	3	2	5	4	6	6	5	4	3	3	3	1	3	3	3	2	4	4	4	3
participant202	5	6	4	5	5	4	5	3	6	4	3	5	4	5	2	3	2	2	2	2	2	3	3	3	5	5	5	3	5	4	5	3	2	3	3	3	3	2	3	2	3	3	3
participant203	5	5	5	5	5	5	4																		4	5	5	4	6	5	4	3	3	3	3	3	3	3	3	3	3	3	3
participant204	6	6	6	6	6	6	7																		5	6	6	4	6	6	6	3	3	3	3	3	3	2	3	3	2	3	4
participant205	5	7	5	6	7	7	7	5	5	5	6	7	7	7	4	4	4	4	3	3	4	4	4	4	4	4	4	5	7	7	7	3	3	3	3	3	3	3	3	3	3	3	3
participant206	5	5	5	5	5	5	3																		4	5	6	4	5	5	6	3	2	2	2	2	3	2	2	3	3	2	2
participant207	4	3	5	5	4	4	4	4	5	5	4	5	4	4	3	3	3	3	3	3	3	3	3	3	5	4	5	4	7	5	4	3	3	3	3	3	3	3	3	3	3	3	3
participant208	5	5	6	7	6	6	4	6	6	6	7	6	6	6	2	3	2	2	3	3	2	3	3	3	4	6	7	7	7	6	5	3	4	2	2	2	3	3	4	3	3	3	3
participant209	4	5	4	7	3	4	5																		3	1	1	5	5	3	5	3	3	3	3	3	3	3	3	3	3	3	3
participant210	5	6	6	6	6	6	5	6	7	6	7	6	7	6	4	4	4	4	4	4	4	4	4	4	5	6	6	5	6	6	5	3	3	3	3	3	3	3	4	4	4	4	4
participant211	4	1	4	3	4	4	3	4	4	4	6	5	4	3	3	3	3	3	3	3	3	3	3	3	2	4	4	4	4	4	4	3	3	3	3	3	3	3	3	3	3	3	3
participant212	1	3	7	4	4	7	4																		6	4	5	3	5	6	3	3	3	3	3	3	3	3	3	3	3	3	3
participant213	2	3	1	6	5	4	3	3	6	6	6	6	5	3	3	2	3	2	2	2	2	3	2	2	2	5	5	5	5	6	4	3	3	3	3	3	3	3	2	4	4	3	3
participant214	4	7	4	7	5	5	6	6	7	6	4	5	5	6	4	4	4	3	3	3	3	3	3	3	4	6	6	6	5	6	5	3	3	3	3	3	3	3	3	3	3	3	3
participant215	5	6	6	6	5	5	5	5	5	5	4	5	5	5	3	3	3	3	3	3	3	3	3	3	3	6	3	6	4	4	5	3	3	3	3	3	3	3	3	3	3	3	3
participant216	4	5	6	2	5	3	4																		1	1	1	4	3	3	3	3	3	3	3	3	3	3	3	3	3	3	3
participant217	1	5	2	1	2	3	1	1	6	4	4	4	4	2	3	3	3	3	2	2	3	3	3	3	5	5	3	2	4	4	3	3	3	3	3	3	3	3	3	3	3	3	3
participant218	4	5	6	3	4	4	4	3	4	5	4	4	4	6	3	3	3	3	3	3	2	3	3	3	3	5	5	3	5	5	6	3	2	3	3	3	2	2	3	3	3	3	3
participant219	5	6	6	6	6	6	5	5	6	6	6	6	4	5	3	3	3	3	3	3	3	3	3	3	5	5	6	5	6	6	6	3	3	3	3	3	3	3	3	3	3	3	3
participant220	6	6	3	5	7	7	6	4	4	4	2	6	6	6	3	3	3	3	3	3	3	3	3	3	4	4	4	4	6	6	6	3	3	3	3	3	3	3	3	3	3	3	3
participant221	3	3	4	5	5	4	3	2	3	2	4	4	5	6	3	3	3	3	3	3	3	3	3	3	6	6	6	6	5	5	5	3	3	3	3	3	3	3	3	3	3	3	3
participant222	7	6	7	5	7	7	4	7	7	7	7	7	7	7	3	4	4	3	4	4	3	3	3	3	7	7	7	7	7	7	7	3	3	3	3	3	3	3	3	3	3	3	3
participant223	5	5	6	5	5	4	5																		3	6	5	3	4	4	3	3	3	3	3	3	2	2	3	2	3	2	3
participant224	6	6	7	4	6	5	6	5	6	7	5	6	5	5	3	3	3	3	3	3	3	3	3	3	6	6	6	6	7	6	6	3	3	3	3	3	3	3	3	3	3	3	3
participant225	4	3	5	6	4	4	3	6	4	5	4	5	5	6	3	3	3	3	3	3	3	3	3	3	3	3	2	4	4	4	4	3	3	3	3	3	3	3	3	3	3	3	3
participant226	3	4	4	4	4	4	3	3	4	4	3	4	4	3	2	3	3	3	2	2	3	3	3	3	2	4	3	2	4	3	4	2	3	3	3	3	3	2	2	3	3	3	3
participant227	3	6	3	5	5	4	5	3	5	5	6	5	5	5	4	2	3	3	2	2	3	3	2	3	3	5	4	3	5	5	5	3	3	3	3	3	3	3	3	3	3	3	3
participant228	4	4	4	5	6	6	5	5	5	5	5	4	4	4	3	2	3	2	3	2	3	2	3	2	4	4	3	2	4	5	4	2	2	3	2	3	3	3	2	3	3	2	3
participant229	6	6	7	7	5	5	4	6	7	6	6	3	3	4	3	3	3	3	3	3	3	3	3	3	5	6	6	4	5	4	3	4	3	3	3	2	3	3	4	4	4	4	3
participant230	5	3	3	5	4	5	3	3	4	3	3	4	4	3	3	3	3	3	3	3	3	3	3	3	3	3	2	4	3	3	3	3	3	2	2	2	2	2	3	2	3	3	2
participant231	6	7	7	7	6	7	6																		6	6	5	4	5	5	5	3	3	3	3	3	3	3	3	3	3	3	3
participant232	1	4	2	3	2	2	1	2	2	2	2	2	2	2	2	2	2	3	3	3	3	3	3	3	2	2	3	3	2	2	2	3	3	3	3	3	3	3	3	3	3	3	3
participant233	2	2	2	1	3	1	2	2	2	2	2	3	3	2	2	2	2	2	2	2	2	2	2	2	2	5	3	3	2	2	2	3	3	3	3	3	3	3	3	3	3	3	3
participant234	5	3	2	3	6	5	5	4	4	4	5	6	5	7	2	2	3	3	3	3	2	3	2	3	2	5	2	4	5	4	6	3	2	3	2	2	3	3	3	3	2	3	3
participant235	4	7	6	6	6	6	6																		4	5	6	7	5	5	4	3	3	3	3	3	3	3	3	3	3	3	3
participant236	5	6	6	5	6	5	5	5	6	6	4	5	5	6	3	3	3	3	3	3	3	3	3	3	6	6	6	6	5	6	4	3	3	3	3	3	3	3	3	3	3	3	3
participant237	4	6	5	4	5	6	5	7	7	7	4	5	4	6	3	3	3	3	3	3	3	3	3	3	5	5	5	5	5	4	5	3	3	3	3	3	3	3	3	3	3	3	4
participant238	6	7	7	7	7	7	7	6	6	6	5	6	6	5	3	3	3	3	3	3	3	3	3	3	6	7	7	5	6	6	6	3	4	3	3	3	4	3	3	2	3	2	3
participant239	5	5	7	7	2	2	2																		3	4	4	4	5	3	4	3	3	3	3	3	3	3	3	3	3	3	3
participant240	5	6	2	7	4	3	4	4	3	2	7	4	1	3	3	3	3	3	3	3	2	4	3	3	4	4	4	4	1	1	1	4	4	4	4	4	4	4	4	4	4	4	4
participant241	1	1	6	6	3	3	3																		4	4	4	4	4	4	4	1	1	1	1	1	1	1	1	1	1	1	1
participant242	3	2	2	5	4	3	3	5	3	2	5	3	2	4	2	3	2	3	2	2	2	2	2	3	3	2	5	5	3	3	1	3	3	2	2	2	2	3	3	3	3	2	2
participant243	4	6	4	4	1	1	3	4	6	4	4	4	4	5	3	2	2	2	2	3	3	3	3	3	5	7	4	5	4	1	4	3	3	3	3	3	3	3	3	3	3	3	3
participant244	5	4	5	4	5	5	5																		4	4	5	5	5	5	5	3	3	3	3	3	3	3	3	3	3	3	3
participant245	5	6	6	6	5	5	6	4	5	6	6	5	5	5	2	2	3	2	2	2	2	2	2	2	5	6	6	6	5	6	4	2	3	2	2	2	2	2	2	2	2	2	2
participant246	2	6	3	4	4	4	6	2	3	4	4	7	7	6	2	2	3	3	3	1	2	3	3	3	2	5	3	4	5	5	6	3	3	3	3	3	3	3	3	3	3	3	3
participant247	2	3	1	6	1	1	2	3	5	2	5	4	4	3	3	2	3	2	3	3	2	3	2	2	2	2	2	2	3	3	3	3	3	2	2	2	3	2	3	2	3	2	2
participant248	5	2	5	2	5	5	3	3	5	4	5	5	3	5	3	3	3	3	3	3	3	3	3	3	4	4	4	3	4	4	4	3	2	3	3	2	3	3	3	3	3	3	2
participant249	6	6	6	3	5	4	3																		5	6	5	6	6	6	5	2	3	2	2	3	3	2	2	2	3	3	3
participant250	5	5	5	1	6	6	5	4	4	4	4	5	5	5	3	3	2	3	3	3	3	3	3	3	4	4	4	4	5	6	6	3	3	2	2	2	3	2	3	3	3	3	3
participant251	6	4	5	5	7	6	6	4	4	4	5	6	5	6	3	3	2	3	3	3	2	3	3	3	6	4	5	5	6	6	6	3	2	2	2	2	3	2	3	3	3	3	3
participant252	4	5	4	5	4	4	4																		4	6	6	5	4	4	4	3	3	3	3	3	3	3	3	3	3	3	3
participant253	6	6	6	4	6	6	5	3	3	4	4	4	5	5	2	2	3	3	2	2	2	1	3	3	4	4	5	4	7	6	7	2	2	3	2	2	2	3	2	2	2	2	2
participant254	4	7	5	1	5	4	6	5	6	6	5	6	5	6	3	3	3	3	3	2	3	3	3	3	6	6	6	6	6	6	6	3	3	3	3	3	3	3	3	3	3	3	3
participant255	5	6	6	5	5	5	4	3	6	5	3	6	5	5	3	3	3	3	3	3	3	3	3	3	5	6	6	5	5	4	4	2	3	2	2	3	2	3	3	2	3	3	3
participant256	6	6	6	6	5	5	6	6	7	7	7	5	6	6	3	3	3	3	4	3	3	3	4	4	7	7	6	5	7	7	7	4	4	4	3	3	3	1	3	4	4	3	3
participant257	5	5	5	4	4	4	4	5	5	5	4	5	4	4	3	3	3	3	3	3	3	3	3	3	5	5	5	6	6	5	4	3	3	3	3	3	3	3	3	3	3	3	3
participant258	5	6	6	4	6	7	4	3	6	6	5	5	5	4	4	2	2	3	4	3	2	3	2	3	4	6	5	5	5	6	5	4	3	3	3	4	4	3	4	2	3	3	3
participant259	2	3	3	4	5	4	6																		5	4	4	5	5	2	4	4	4	4	4	3	3	3	3	3	3	4	4
participant260	6	6	6	1	5	4	6	5	6	5	3	5	5	4	3	2	3	3	3	3	2	3	3	4	3	6	6	2	6	4	5	3	3	3	3	3	3	3	3	3	3	3	3
participant261	4	2	4	2	2	2	3	2	3	3	3	4	3	4	3	2	3	3	3	3	3	3	3	3	2	3	2	1	2	3	3	3	3	3	3	3	3	3	3	3	3	3	3
participant262	5	5	6	4	5	6	6	5	6	6	4	6	5	5	3	3	3	2	2	2	2	3	3	3	5	6	6	4	5	5	5	3	3	3	3	3	3	3	3	3	3	3	3
participant263	5	5	5	4	5	6	4	4	5	5	5	6	6	6	2	3	3	3	3	3	2	3	2	3	4	4	3	4	5	5	4	3	3	3	3	3	3	3	3	3	3	3	3
participant264	5	6	6	4	5	5	6	6	6	7	5	5	7	7	3	2	3	3	2	3	2	2	2	3	5	6	6	5	5	6	6	3	3	3	3	3	3	3	3	3	3	3	3
participant265	4	5	5	4	5	5	5	5	6	6	4	6	5	5	2	3	3	3	3	3	3	3	3	3	6	6	6	5	5	5	5	3	3	3	3	3	3	3	3	3	3	3	3
participant266	4	3	5	5	6	6	4																		5	6	6	5	5	5	5	1	1	1	1	1	1	1	1	1	1	1	1
participant267	4	4	4	4	4	4	4	4	4	4	4	4	4	3	2	2	2	2	1	2	2	2	2	2	2	4	3	3	4	3	2	2	2	2	3	3	2	2	3	3	3	3	3
participant268	6	5	6	6	5	5	5	5	5	6	7	6	6	6	3	3	3	3	3	3	3	3	3	3	6	6	6	6	6	6	6	3	3	3	3	3	3	3	3	3	3	3	3
participant269	4	5	6	4	6	5	4																		4	5	6	5	6	6	6	3	3	3	3	4	3	4	3	3	3	3	4
participant270	5	6	7	6	6	6	3																		5	5	7	5	5	4	5	3	3	2	3	2	3	2	3	3	3	3	3
participant271	5	4	4	4	3	3	3	4	4	4	4	4	4	4	1	1	1	1	1	1	1	1	1	1	4	4	4	4	3	3	4	1	1	1	1	1	1	1	1	1	1	1	1
participant272	5	5	6	3	4	4	5	4	5	5	4	5	5	4	3	3	3	3	3	3	3	3	3	3	4	5	6	4	5	5	5	3	3	3	3	3	3	3	3	3	3	3	3
participant273	5	5	5	3	4	5	4	5	4	5	4	4	4	5	3	2	2	2	2	2	2	2	2	2	4	4	4	4	2	2	3	3	3	2	3	3	3	3	3	3	3	3	3
participant274	5	5	5	5	4	4	3	4	4	6	5	5	5	5	4	3	3	4	3	4	3	4	3	4	5	5	5	6	6	6	5	3	3	3	3	3	4	4	3	4	4	3	3
participant275	4	6	6	5	6	5	5	5	5	5	4	5	5	5	3	3	3	3	3	3	3	3	3	3	5	6	6	4	5	5	4	3	2	3	3	3	3	3	3	3	3	3	3
participant276	6	6	6	7	6	6	6																		5	6	6	6	6	7	6	3	3	3	3	3	3	3	3	3	3	3	3
participant277	5	4	4	4	3	4	4																		5	6	4	6	4	4	4	3	3	3	3	3	3	3	3	3	3	3	3
participant278	6	6	6	6	5	5	4	4	5	5	4	5	6	5	3	3	3	3	3	3	3	3	3	3	5	5	5	5	6	6	6	3	3	3	3	3	3	3	3	3	3	3	3
participant279	2	6	5	4	3	4	3	3	5	4	3	3	3	3	3	3	3	3	3	3	2	3	3	3	3	5	4	3	5	4	2	3	3	3	2	3	2	2	3	2	3	3	3
participant280	3	6	5	3	4	4	4	3	2	4	4	4	3	4	3	3	3	3	3	3	3	3	3	3	3	5	4	3	4	4	3	3	3	3	3	3	3	3	3	3	3	3	3
participant281	5	7	5	3	7	6	4	5	6	7	7	7	7	3	3	3	3	3	3	3	3	3	3	3	5	7	5	1	7	7	4	3	3	3	3	3	3	3	3	3	3	3	3
participant282	6	6	6	6	6	6	6																		5	6	5	6	6	7	7	3	3	3	3	3	4	2	3	3	3	3	3
participant283	3	6	5	5	6	5	6	4	4	6	5	6	6	5	2	2	1	1	1	1	2	1	1	1	5	5	6	7	6	6	5	1	1	1	1	1	1	1	1	1	1	1	2
participant284	4	4	5	4	4	4	4	3	2	1	3	1	1	4	1	1	1	1	1	1	1	1	1	1	4	4	4	4	5	4	4	2	2	3	2	2	2	2	2	2	2	2	2
participant285	2	3	4	2	5	4	3	2	3	3	2	5	3	3	4	2	3	3	3	2	2	3	2	3	5	5	5	3	5	3	3	3	3	3	3	3	3	3	3	2	3	3	2
participant286	5	7	7	6	7	6	6	5	5	6	6	6	6	6	3	3	3	3	3	3	3	4	3	3	4	5	7	5	6	6	7	3	3	3	3	3	3	3	3	3	3	3	3
participant287	1	2	2	2	2	5	4	3	2	2	6	2	2	2	3	3	3	3	3	3	3	3	3	3	2	2	2	7	3	3	3	3	3	3	3	3	3	2	3	2	3	3	3
participant288	4	4	4	5	6	6	4	6	6	6	6	6	6	6	3	3	3	3	3	3	3	3	3	3	7	7	7	7	7	7	7	4	4	4	4	4	4	4	4	4	4	4	4
participant289	3	3	3	4	4	4	4																		3	3	4	2	5	5	4	3	2	3	3	2	2	3	3	2	2	3	3
participant290	6	6	6	5	6	6	5	5	6	6	4	6	6	6	4	3	3	2	2	3	3	4	3	3	6	6	6	5	6	6	6	4	3	3	3	3	3	3	3	3	3	4	3
participant291	1	2	1	1	3	2	4	1	2	3	1	2	2	3	3	3	3	3	3	4	4	4	3	3	1	3	1	1	2	2	2	3	3	3	3	3	4	4	4	3	4	4	3
participant292	3	2	3	5	4	2	3																		3	5	3	4	4	4	4	3	3	3	3	3	3	3	3	3	3	3	3
participant293	5	5	4	4	6	5	4	4	4	4	4	4	4	4	2	3	3	3	3	3	3	3	3	3	4	6	5	4	5	6	5	3	3	3	3	3	3	3	3	3	3	3	3
participant294	2	5	6	5	4	4	3	4	4	4	4	4	4	4	3	3	3	3	3	3	3	3	3	3	4	4	4	4	4	4	4	2	2	2	2	2	2	2	2	2	2	2	2
participant295	5	5	5	5	6	6	5																		4	6	5	5	5	5	4	2	3	2	2	3	2	3	3	2	2	3	3
participant296	5	7	5	6	5	7	6	6	7	5	6	6	7	5	4	3	4	3	4	3	1	4	4	3	5	6	6	5	6	7	7	3	4	4	4	3	3	2	3	2	2	3	3
participant297	4	4	4	4	4	4	4	4	5	5	3	4	5	5	3	3	3	3	3	3	3	3	3	3	5	5	5	5	5	5	5	3	3	3	3	3	3	3	3	3	3	3	3
participant298	1	1	2	2	3	3	3	6	5	5	3	5	3	4	4	3	3	3	3	3	3	3	3	3	4	4	4	4	5	5	5	2	3	1	2	2	2	2	2	2	2	2	2
participant299	4	5	6	5	5	4	4																		3	2	4	5	4	4	4	3	3	3	3	2	3	3	3	3	3	3	3
participant300	6	5	6	4	5	5	5	5	6	6	5	6	6	6	3	4	4	4	4	4	3	4	4	4	6	6	7	6	6	6	6	3	3	3	4	3	4	3	4	4	3	3	4
participant301	5	5	6	4	5	5	6	4	4	4	4	5	4	4	2	2	3	2	3	2	2	3	2	3	4	4	5	4	5	5	4	3	3	3	3	3	3	3	3	3	3	3	3
participant302	7	7	7	7	6	5	5	6	6	7	7	6	5	5	3	3	3	3	3	3	3	3	4	4	7	7	7	7	6	5	4	4	4	3	3	4	4	3	3	4	3	3	3
participant303	3	4	4	5	5	4	4																		6	6	5	6	5	5	4	3	3	3	3	3	3	3	3	3	3	3	3
participant304	6	5	5	2	6	6	4																		3	4	5	2	5	5	3	3	3	3	3	3	3	3	3	3	3	3	3
participant305	4	6	4	2	5	3	3	4	6	5	2	4	3	3	3	3	2	2	2	2	2	2	2	2	6	7	7	5	5	5	4	3	3	3	2	2	2	2	2	4	3	3	3
participant306	6	7	6	7	6	6	5	5	6	6	6	5	5	5	3	3	3	3	3	3	3	3	3	3	5	5	6	7	4	4	3	3	3	3	3	3	3	3	3	3	3	3	3
participant307	5	6	6	5	6	5	5	6	6	6	6	6	6	6	3	3	3	3	3	3	3	3	3	3	6	6	6	5	5	5	5	3	3	3	3	3	3	3	3	3	3	3	3
participant308	2	2	1	2	5	6	4	3	1	1	2	2	2	2	3	3	3	3	3	3	3	3	3	3	2	3	3	2	3	3	3	2	3	2	3	3	2	3	2	3	4	3	4
participant309	3	3	3	3	4	4	4																		3	2	3	3	3	3	3	3	2	3	3	3	2	3	3	3	3	3	3
participant310	5	6	7	6	6	5	5	5	5	5	4	5	5	6	3	3	3	3	3	3	3	3	3	3	6	6	6	7	6	5	6	3	3	3	3	3	3	3	3	3	3	3	3
participant311	6	5	5	5	6	6	5	6	4	5	6	5	5	5	3	3	3	3	3	3	3	3	3	3	6	5	6	6	6	6	6	3	3	3	3	3	3	3	3	3	3	3	3
participant312	3	3	3	4	6	6	6	4	3	3	3	5	6	4	3	3	3	3	3	3	3	3	3	3	4	2	5	5	6	5	4	3	3	3	3	3	3	4	4	3	3	3	3
participant313	4	5	5	5	6	6	6																		6	6	6	6	5	5	5	3	3	3	3	3	3	3	3	3	3	3	3
participant314	5	6	5	5	5	4	3	3	4	4	4	4	5	3	3	2	2	2	2	3	2	2	3	2	3	6	5	4	4	4	3	3	2	2	2	2	3	2	3	2	3	2	3
participant315	2	2	2	3	4	3	3																		2	3	2	3	3	3	3	3	3	3	3	3	3	3	3	3	3	3	3
participant316	2	1	2	2	4	4	2	4	4	4	4	4	6	4	3	3	3	3	3	3	3	3	3	3	4	3	3	3	3	4	3	3	3	3	2	2	3	2	3	2	3	2	3
participant317	5	6	4	6	4	4	3	2	2	3	3	3	3	3	3	2	3	2	2	3	3	3	3	3	4	5	5	5	4	4	4	3	3	3	3	3	3	3	2	3	3	3	3
participant318	5	7	7	7	6	6	5	5	6	6	6	7	7	6	3	3	3	3	3	3	3	3	3	3	5	7	7	7	6	6	7	3	3	3	3	3	3	3	3	3	3	3	3
participant319	5	6	6	2	6	6	6	5	6	5	6	5	6	6	4	4	4	4	4	4	4	4	4	4	5	5	6	4	5	5	4	3	3	4	4	4	4	3	4	4	4	4	3
participant320	5	5	6	6	6	6	5	4	5	5	3	6	6	5	3	3	3	3	3	3	3	3	3	3	5	5	6	3	6	6	5	3	3	3	3	3	2	3	3	3	3	3	3
participant321	6	4	6	4	5	5	4	4	4	4	4	1	4	4	3	3	3	3	3	3	3	3	3	3	4	4	4	4	5	5	5	4	3	3	3	3	3	3	3	3	3	3	3
participant322	4	4	4	4	5	5	5																		5	4	4	3	5	4	4	3	3	3	3	3	3	3	3	3	3	3	3
participant323	6	6	5	5	6	5	5	4	5	5	4	6	5	5	3	3	3	3	3	3	2	3	3	3	6	6	4	4	6	5	5	3	3	2	3	3	3	3	3	3	3	3	3
participant324	3	5	7	6	6	6	6	5	5	6	5	6	7	5	2	3	3	3	2	2	3	3	2	2	5	5	5	3	5	7	6	2	2	2	3	3	2	2	3	2	3	3	3
participant325	4	4	4	4	7	7	5	7	7	7	7	5	5	5	3	3	3	3	3	3	3	4	3	2	5	5	5	6	4	4	4	3	3	3	3	3	3	3	3	3	3	3	3
participant326	3	3	3	2	2	2	2	5	3	3	2	4	4	4	3	3	3	3	3	3	3	3	3	3	3	3	2	1	2	3	3	3	3	2	2	3	3	2	3	3	3	2	3
participant327	5	5	5	5	5	5	5																		5	5	4	6	5	5	5	3	3	4	4	3	2	3	3	3	4	4	4
participant328	5	4	6	6	5	5	5	5	5	6	4	5	4	4	3	3	3	3	3	3	3	3	3	3	5	6	6	5	5	5	5	3	3	3	3	3	3	3	3	3	3	3	3
participant329	5	6	3	3	5	4	2																		2	2	2	3	3	3	3	3	2	2	2	2	2	3	2	2	2	2	2
participant330	5	4	4	7	4	3	4																		4	5	5	4	4	4	5	3	3	3	3	3	3	3	3	3	3	3	3
participant331	5	6	6	3	6	6	6																		5	6	5	4	5	6	5	3	3	3	3	3	3	3	3	3	3	3	3
participant332	4	4	3	3	5	5	4	4	4	4	4	4	4	4	3	3	3	3	3	3	3	3	3	3	4	4	5	4	5	5	4	3	3	3	3	3	3	3	3	3	3	3	3
participant333	3	5	6	6	4	5	5	3	3	3	3	5	5	5	3	3	3	1	1	1	1	1	1	1	4	4	4	4	5	6	6	3	3	3	3	3	3	3	3	3	3	3	3
participant334	3	6	6	4	6	6	5																		5	6	5	1	6	5	6	3	4	4	3	3	3	3	3	3	3	3	3
participant335	5	7	7	6	6	6	6	4	6	6	6	6	6	6	3	3	3	3	3	3	3	3	3	3	6	6	6	6	7	7	7	4	4	4	4	4	4	4	4	4	4	4	4
participant336	2	4	2	3	3	3	5																		4	6	4	6	5	3	2	2	2	3	3	3	2	2	3	2	2	2	3
participant337	6	6	6	6	6	5	5																		6	6	6	6	5	5	5	3	3	3	3	3	3	3	3	3	3	3	3
participant338	5	6	4	4	5	5	6																		4	6	6	5	7	5	5	3	3	3	3	3	3	3	3	3	3	3	3
participant339	3	4	4	4	4	4	4	4	4	4	5	4	4	4	3	3	3	3	3	3	3	3	3	3	4	4	4	4	4	4	4	3	3	3	3	3	3	3	3	3	3	3	3
participant340	5	5	5	5	5	5	5	6	6	6	6	5	5	5	3	3	3	3	3	3	3	3	3	3	6	6	6	4	6	5	6	3	3	3	3	3	3	3	3	3	3	3	3
participant341	5	3	4	2	6	7	5																		4	4	5	4	6	6	6	3	3	3	3	3	3	3	3	3	3	3	3
participant342	4	4	4	4	5	5	5																		4	4	4	4	4	4	4	3	3	3	3	3	3	3	3	3	3	3	3
participant343	6	7	7	7	7	7	4	5	6	7	5	7	5	4	2	2	3	3	2	2	2	3	2	3	4	5	6	5	6	7	5	2	3	3	3	4	4	3	3	2	3	3	2
participant344	6	7	7	7	6	7	7	3	7	4	2	4	7	1	3	1	1	1	1	1	1	1	1	1	4	7	6	5	5	6	3	3	1	2	1	1	1	1	1	1	1	3	1
participant345	4	3	4	4	6	4	5	4	4	4	4	5	5	5	3	3	3	3	3	3	3	3	3	3	4	4	4	4	6	6	5	3	3	3	3	3	3	3	3	3	3	3	3
participant346	5	6	4	4	5	5	5	5	6	5	4	5	5	4	2	2	2	2	2	2	2	2	2	2	5	6	6	5	5	4	5	3	3	2	2	3	3	3	3	2	3	3	3
participant347	4	4	4	3	6	5	5																		4	4	4	4	5	5	5	3	3	3	3	3	3	3	3	3	3	3	3
participant348	4	4	5	4	5	5	6	5	5	5	5	5	5	5	4	3	3	3	3	3	3	4	3	3	5	4	5	5	5	5	5	3	3	3	3	3	3	3	3	3	4	3	3
participant349	3	5	5	3	5	4	4																		4	4	3	3	4	3	4	3	3	3	2	3	4	2	3	2	3	3	3
participant350	5	4	5	3	5	6	6	5	5	5	5	4	4	5	3	3	3	3	3	3	3	3	2	3	3	4	4	5	6	5	5	3	3	3	2	2	3	3	3	3	3	3	3
																																										2.92	2.95714
																																										0.501459	0.536243
